# Supplementary material
Source: Springer Nature journal article supplement (https://www.springermedizin.de/resource/supplementary/13014_2010_306_MOESM3_ESM.pdf/9633152)

# A (a) Control

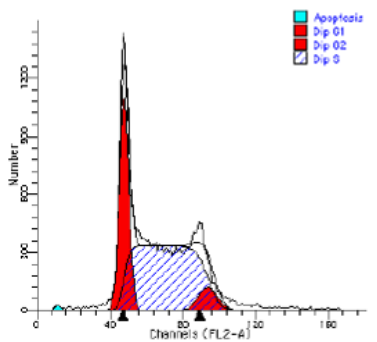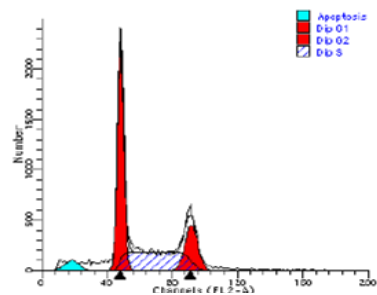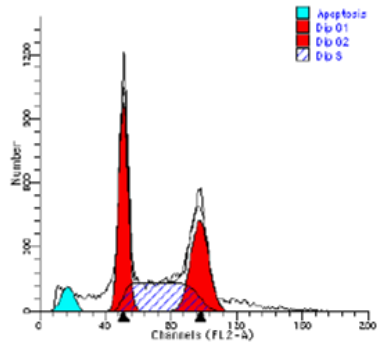

# (b) miRNA-17-92

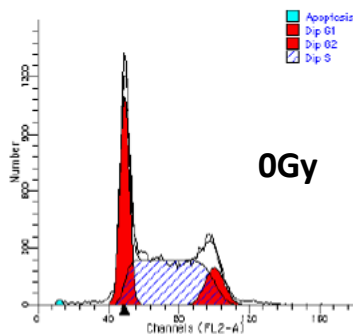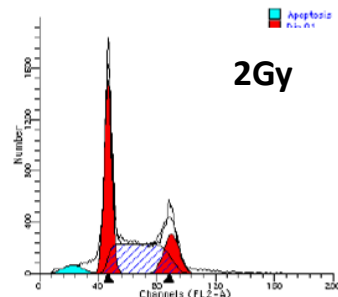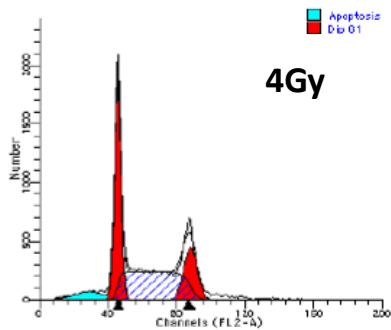

# B

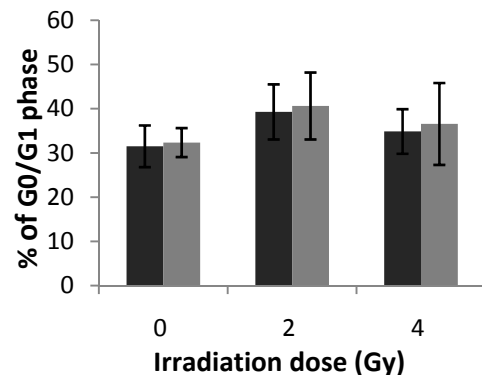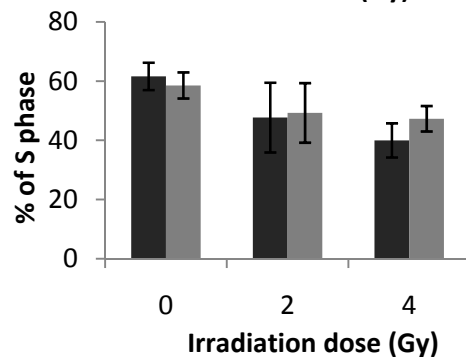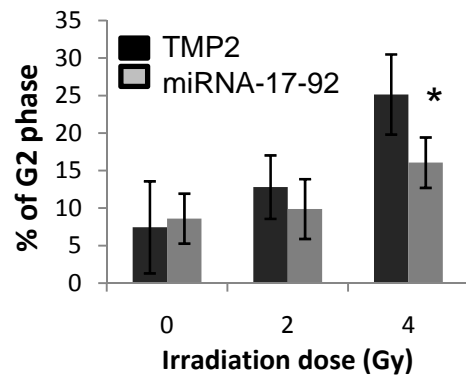

Supplement: MOESM3 [file 9633152]
